# Supplementary material for: Adherence to a Western dietary pattern and risk of bladder cancer: A pooled analysis of 13 cohort studies of the Bladder Cancer Epidemiology and Nutritional Determinants international study
Source: PubMed Central journal article supplement (PMC7689707; doi:10.1002/ijc.33173), 2020-07-20
Supplement: IJC-147-3394-s001.pdf [file IJC-147-3394-s001.pdf]

## Supplementary Material

### **Adherence to a Western dietary pattern and risk of bladder cancer: a pooled analysis of 13 Cohort Studies of the Bladder Cancer Epidemiology and Nutritional Determinants (BLEND) International Study**

Mostafa Dianatinasab, Anke Wesselius, Amin Salehi-Abargouei, Evan Y.W. Yu, Maree Brinkman, Mohammad Fararouei, Piet van den Brandt, Emily White, Elisabete Weiderpass, Florence Le Calvez-Kelm, Marc Gunter, Inge Huybrechts, Fredrik Liedberg, Guri Skeie, Anne Tjønneland, Elio Riboli, Graham G. Giles, Roger L. Milne, Maurice P. Zeegers

**Supplementary Table 1.** Hazard ratio (HR) and 95% confidence intervals (CIs) based on tertile of Western diet score stratified by gender and smoking status.

**Supplementary Table 2.** Hazard ratio (HR) and 95% confidence intervals (CIs) based on tertile of Western diet score by cancer sub-types.

**Supplementary Table 1.** Hazard ratio (HR) and 95% confidence intervals (CIs) based on tertile of Western diet score stratified by gender and smoking status.

| Subgroup                     | Tertile 1<br>HR (95%CI) * | Tertile 2<br>HR (95%CI) | Tertile 3<br>HR (95%CI) | <i>P trend</i> |
|------------------------------|---------------------------|-------------------------|-------------------------|----------------|
| <b>Women</b>                 |                           |                         |                         |                |
| <b>Current smoker</b>        |                           |                         |                         |                |
| <b>Participants (number)</b> |                           |                         |                         | -              |
| Case/non-case                | 56/ 23,263                | 94/ 23,912              | 88/ 23,674              |                |
| Pearson year                 | 248664.7                  | 265448.4                | 266072.3                | -              |
| Crude                        | 1 (reference)             | 1.38 (0.99, 1.91)       | 1.25 (0.90, 1.75)       | 0.217          |
| Model 1 <sup>1</sup>         | 1 (reference)             | 1.45 (1.03, 2.03)       | 1.40 (0.97, 2.02)       | 0.080          |
| Model 2 <sup>2</sup>         | 1 (reference)             | 1.45 (1.03, 2.03)       | 1.36 (0.96, 2.00)       | 0.999          |
| <b>Former smoker</b>         |                           |                         |                         |                |
| <b>Participants (number)</b> |                           |                         |                         | -              |
| Case/non-case                | 86/ 35,031                | 94/ 32,064              | 47/ 26,387              |                |
| Pearson year                 | 357183.6                  | 363339.4                | 299911.1                | -              |
| Crude                        | 1 (reference)             | 1.02 (0.76, 1.37)       | 0.70 (0.49, 1.00)       | 0.079          |
| Model 1 <sup>1</sup>         | 1 (reference)             | 1.10 (0.81, 1.49)       | 0.80 (0.54, 1.19)       | 0.377          |
| Model 2 <sup>2</sup>         | 1 (reference)             | 1.11 (0.81, 1.51)       | 0.81 (0.55, 1.21)       | 0.425          |
| <b>Never smoker</b>          |                           |                         |                         |                |
| <b>Participants (number)</b> |                           |                         |                         | -              |
| Case/non-case                | 114/ 82,364               | 154/ 76,505             | 87/ 64, 055             |                |
| Pearson year                 | 903011.4                  | 890789.3                | 732229.1                | -              |
| Crude                        | 1 (reference)             | 1.38 (1.09, 1.77)       | 1.09 (0.82, 1.45)       | 0.358          |
| Model 1 <sup>1</sup>         | 1 (reference)             | 1.49 (1.16, 1.91)       | 1.28 (0.95, 1.47)       | 0.055          |
| Model 2 <sup>2</sup>         | 1 (reference)             | 1.47 (1.14, 1.89)       | 1.27 (0.93, 1.72)       | 0.073          |
| <b>Men</b>                   |                           |                         |                         |                |
| <b>Current smoker</b>        |                           |                         |                         |                |
| <b>Participants (number)</b> |                           |                         |                         | -              |
| Case/non-case                | 166/ 9,873                | 364/ 14,974             | 465/ 22,358             |                |
| Pearson year                 | 106860.5                  | 170458                  | 252179                  | -              |
| Crude                        | 1 (reference)             | 1.49 (1.24, 1.80)       | 1.47 (1.23, 1.76)       | <0.001         |
| Model 1 <sup>1</sup>         | 1 (reference)             | 1.56 (1.29, 1.88)       | 1.61 (1.34, 1.95)       | 0.001          |
| Model 2 <sup>2</sup>         | 1 (reference)             | 1.63 (1.35, 1.96)       | 1.78 (1.46, 2.16)       | <0.001         |
| <b>Former smoker</b>         |                           |                         |                         |                |
| <b>Participants (number)</b> |                           |                         |                         | -              |
| Case/non-case                | 305/ 25,328               | 469/ 24,844             | 461/ 26,312             |                |
| Pearson year                 | 243256                    | 282458.2                | 308673.5                | -              |
| Crude                        | 1 (reference)             | 1.40 (1.21, 1.62)       | 1.55 (1.34, 1.80)       | <0.001         |
| Model 1 <sup>1</sup>         | 1 (reference)             | 1.47 (1.26, 1.70)       | 1.71 (1.46, 2.00)       | 0.001          |
| Model 2 <sup>2</sup>         | 1 (reference)             | 1.44 (1.24, 1.68)       | 1.67 (1.42, 1.96)       | <0.001         |
| <b>Never smoker</b>          |                           |                         |                         |                |
| <b>Participants (number)</b> |                           |                         |                         | -              |
| Case/non-case                | 93/ 22,394                | 140/ 22,524             | 116/ 21,505             |                |
| Pearson year                 | 227755.3                  | 270656.7                | 262359.7                | -              |
| Crude                        | 1 (reference)             | 1.38 (1.06, 1.79)       | 1.35 (1.02, 1.78)       | 0.032          |
| Model 1 <sup>1</sup>         | 1 (reference)             | 1.40 (1.07, 1.84)       | 1.39 (1.04, 1.87)       | 0.029          |

|                      |               |                   |                   |       |
|----------------------|---------------|-------------------|-------------------|-------|
| Model 2 <sup>2</sup> | 1 (reference) | 1.39 (1.06, 1.83) | 1.37 (1.01, 1.85) | 0.045 |
|----------------------|---------------|-------------------|-------------------|-------|

\* HR= hazard ratio, CI= confidence interval.

<sup>1</sup> adjusted for energy intake, smoking status, smoking intensity, age and sex.

<sup>2</sup> adjusted for model 1+ fluid intake, fruit and vegetables intakes.

**Supplementary Table 2.** Hazard ration (HR) and 95% confidence intervals (CIs) based on tertile of Western diet score by cancer sub-types.

|                              | Tertile 1<br>HR (95%CI) * | Tertile 2<br>HR (95%CI) | Tertile 3<br>HR (95%CI) | <i>P trend</i> |
|------------------------------|---------------------------|-------------------------|-------------------------|----------------|
| <b>NMIBC**</b>               |                           |                         |                         | -              |
| <b>Participants (number)</b> |                           |                         |                         | -              |
| Cases                        | 334                       | 547                     | 484                     |                |
| Pearson year                 | 2469.457                  | 5147.161                | 4333.148                | -              |
| Crude                        | 1 (reference)             | 0.83 (0.72, 0.95)       | 0.94 (0.82, 1.09)       | 0.701          |
| Model 1 <sup>1</sup>         | 1 (reference)             | 1.10 (0.91, 1.31)       | 1.40 (1.16, 1.69)       | <0.001         |
| Model 2 <sup>2</sup>         | 1 (reference)             | 1.09 (0.86, 1.37)       | 1.28 (1.02, 1.63)       | <0.001         |
| <b>MIBC+</b>                 |                           |                         |                         | -              |
| <b>Participants (number)</b> |                           |                         |                         | -              |
| Cases                        | 189                       | 380                     | 305                     |                |
| Pearson year                 | 1616.891                  | 3944.66                 | 3117.87                 | -              |
| Crude                        | 1 (reference)             | 0.87 (0.73, 1.04)       | 0.93 (0.78, 1.12)       | 0.672          |
| Model 1 <sup>1</sup>         | 1 (reference)             | 1.20 (0.95, 1.50)       | 1.33 (1.05, 1.69)       | 0.019          |
| Model 2 <sup>2</sup>         | 1 (reference)             | 1.09 (0.86, 1.37)       | 1.28 (1.01, 1.64)       | 0.028          |

\* HR= hazard ratio, CI= confidence interval. \*\* NMIBC = non-muscle-invasive bladder cancer, \*MIBC= muscle-invasive bladder cancer.

<sup>1</sup> adjusted for energy intake, smoking status, smoking intensity, age and sex.

<sup>2</sup> adjusted for model 1+ fluid intake, fruit and vegetables intakes.
